# Supplementary material
Source: bioRxiv or medRxiv preprint supplement (https://www.biorxiv.org/highwire/filestream/38797/field_highwire_adjunct_files/0/129460-1.pdf)
Supplement: Supplementary file [file 129460-1.pdf]

## Supplemental Figures and Tables

### Using genotype-environment associations to identify multilocus local adaptation

Brenna R. Forester, Jesse R. Lasky, Helene H. Wagner, Dean L. Urban

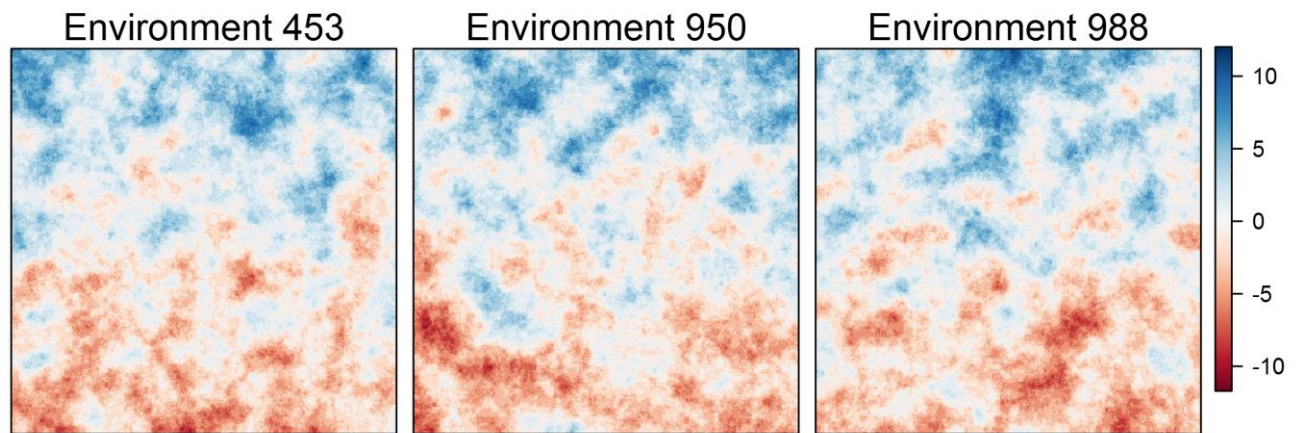

**Figure S1.** The three environmental surfaces used as replicates from Lotterhos & Whitlock (2015). Colors represent values of the environment.

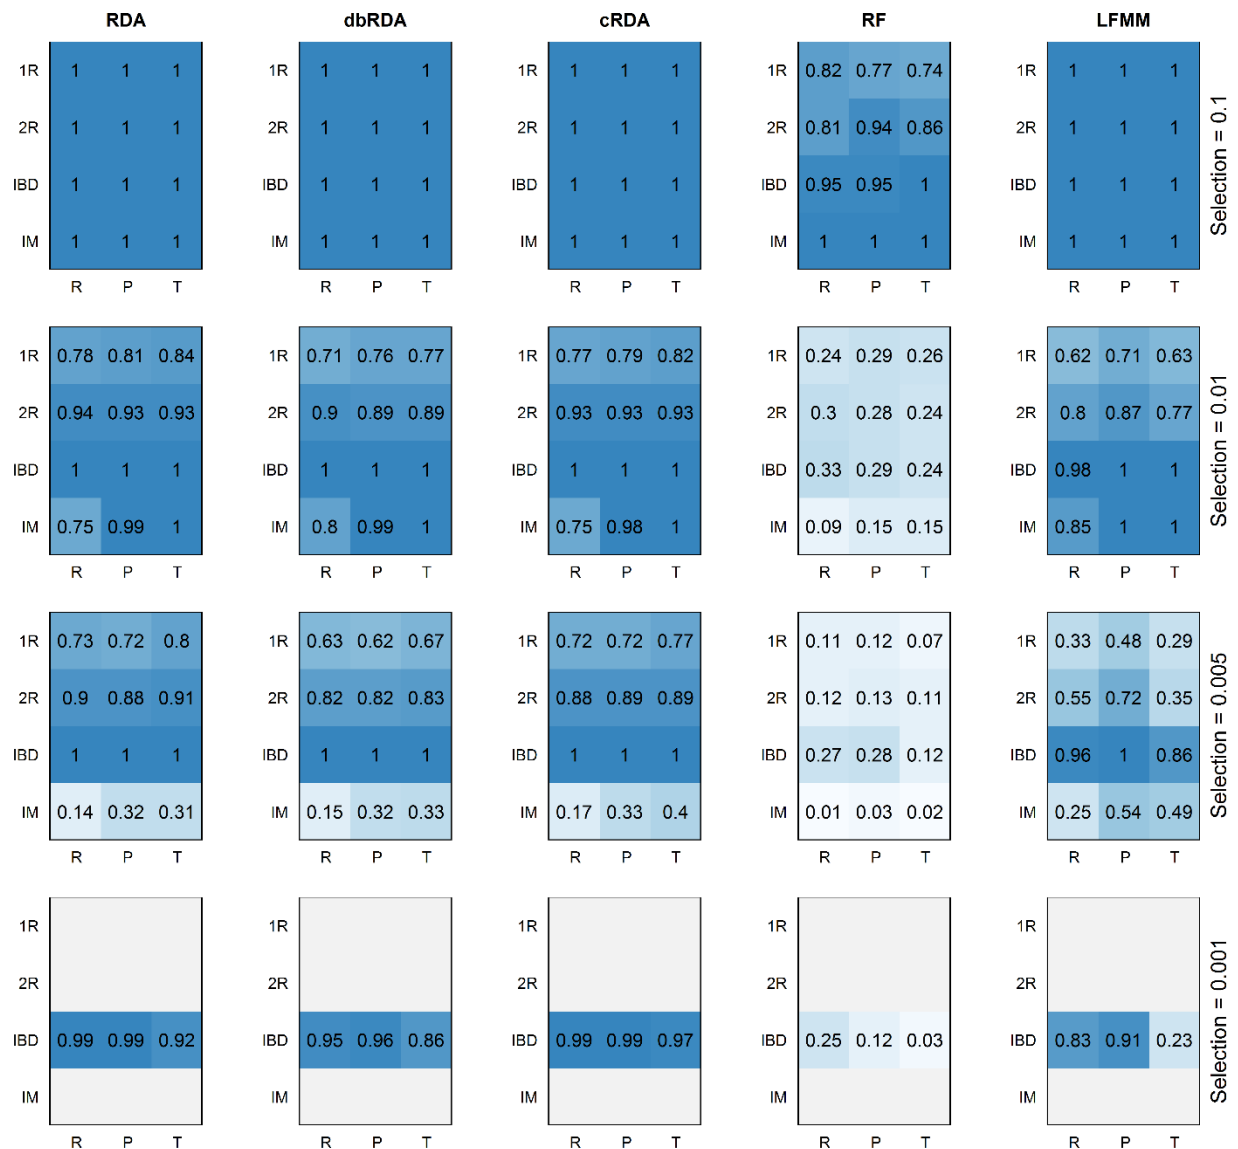

**Figure S2.** Average true positive rates for different levels of selection (rows) from five methods (columns) using locus rankings and a sample size of 6 individuals per deme. Each method shows results for different sampling strategies (R = random, P = pairs, T = transects) and demographies (1R and 2R = refugial expansion, IBD = equilibrium isolation by distance, IM = equilibrium island model). Only the IBD demography included very weak selection ( $s=0.001$ ).

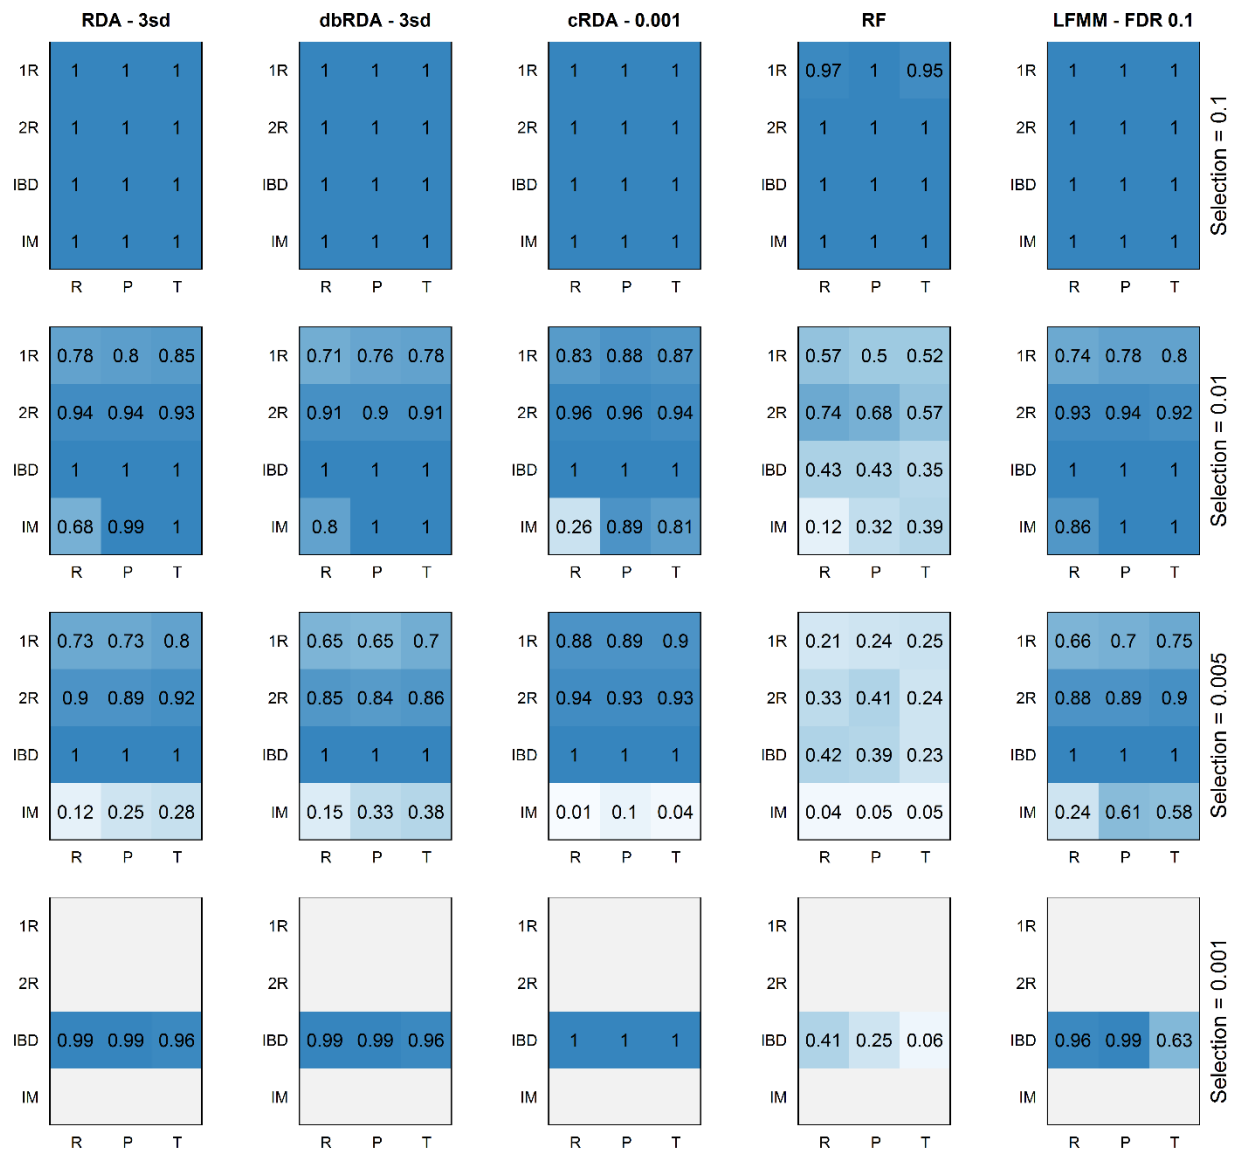

**Figure S3.** Average true positive rates for different levels of selection (rows) from five methods (columns) using the best cutoff for each method and a sample size of 6 individuals per deme. Each method shows results for different sampling strategies (R = random, P = pairs, T = transects) and demographies (1R and 2R = refugial expansion, IBD = equilibrium isolation by distance, IM = equilibrium island model). Only the IBD demography included very weak selection ( $s=0.001$ ).

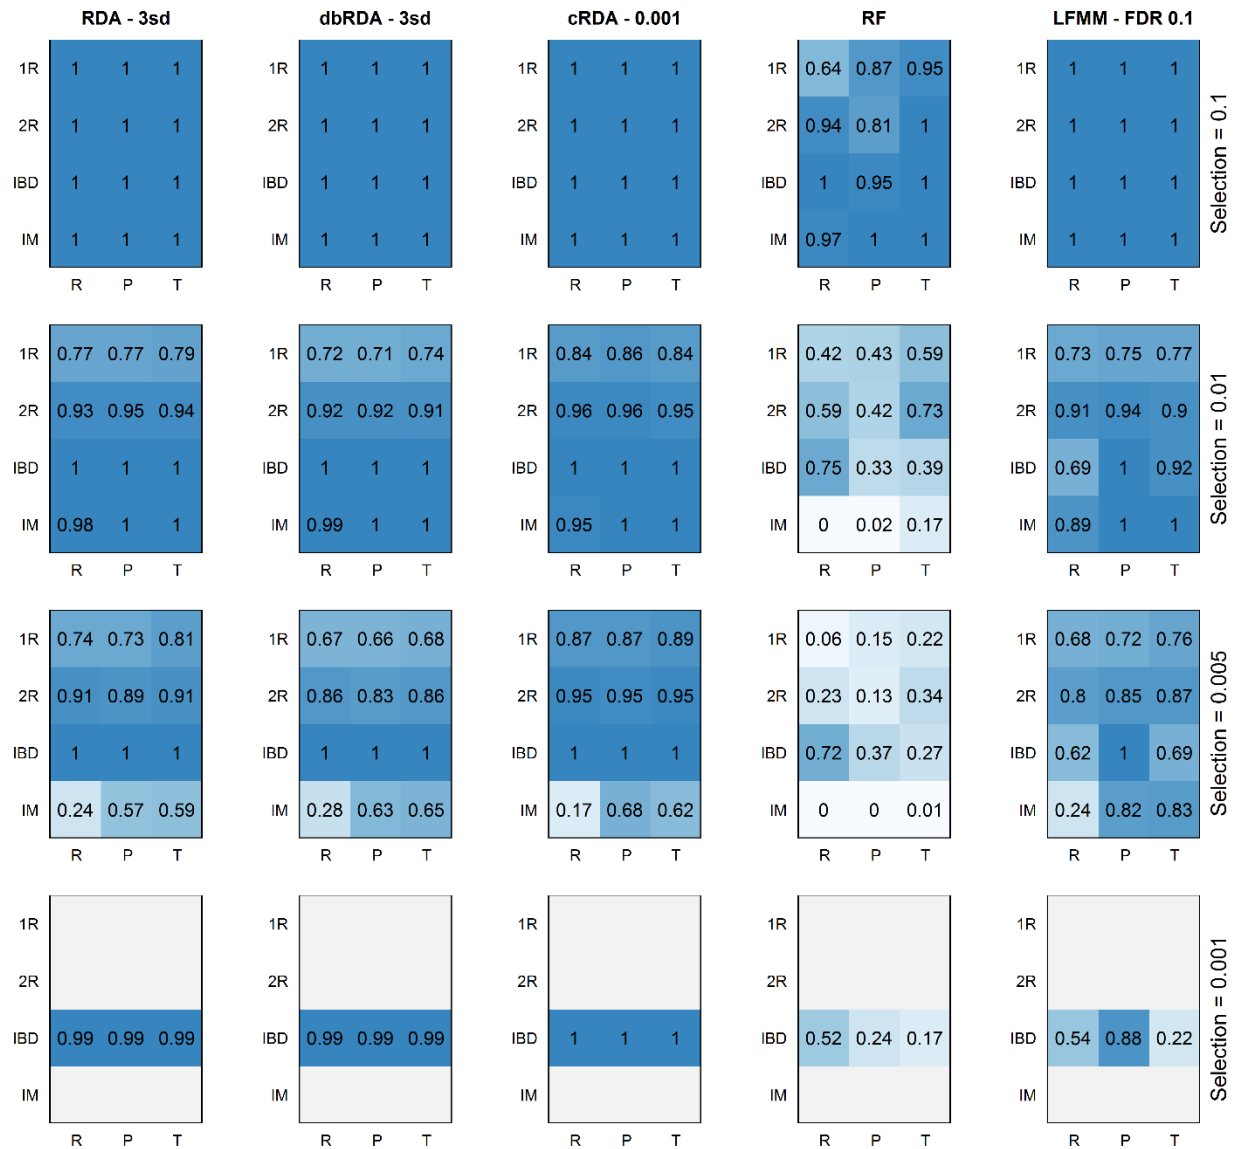

**Figure S4.** Average true positive rates for different levels of selection (rows) from five methods (columns) using the best cutoff for each method and a sample size of 20 individuals per deme. Each method shows results for different sampling strategies (R = random, P = pairs, T = transects) and demographies (1R and 2R = refugial expansion, IBD = equilibrium isolation by distance, IM = equilibrium island model). Only the IBD demography included very weak selection (s=0.001).

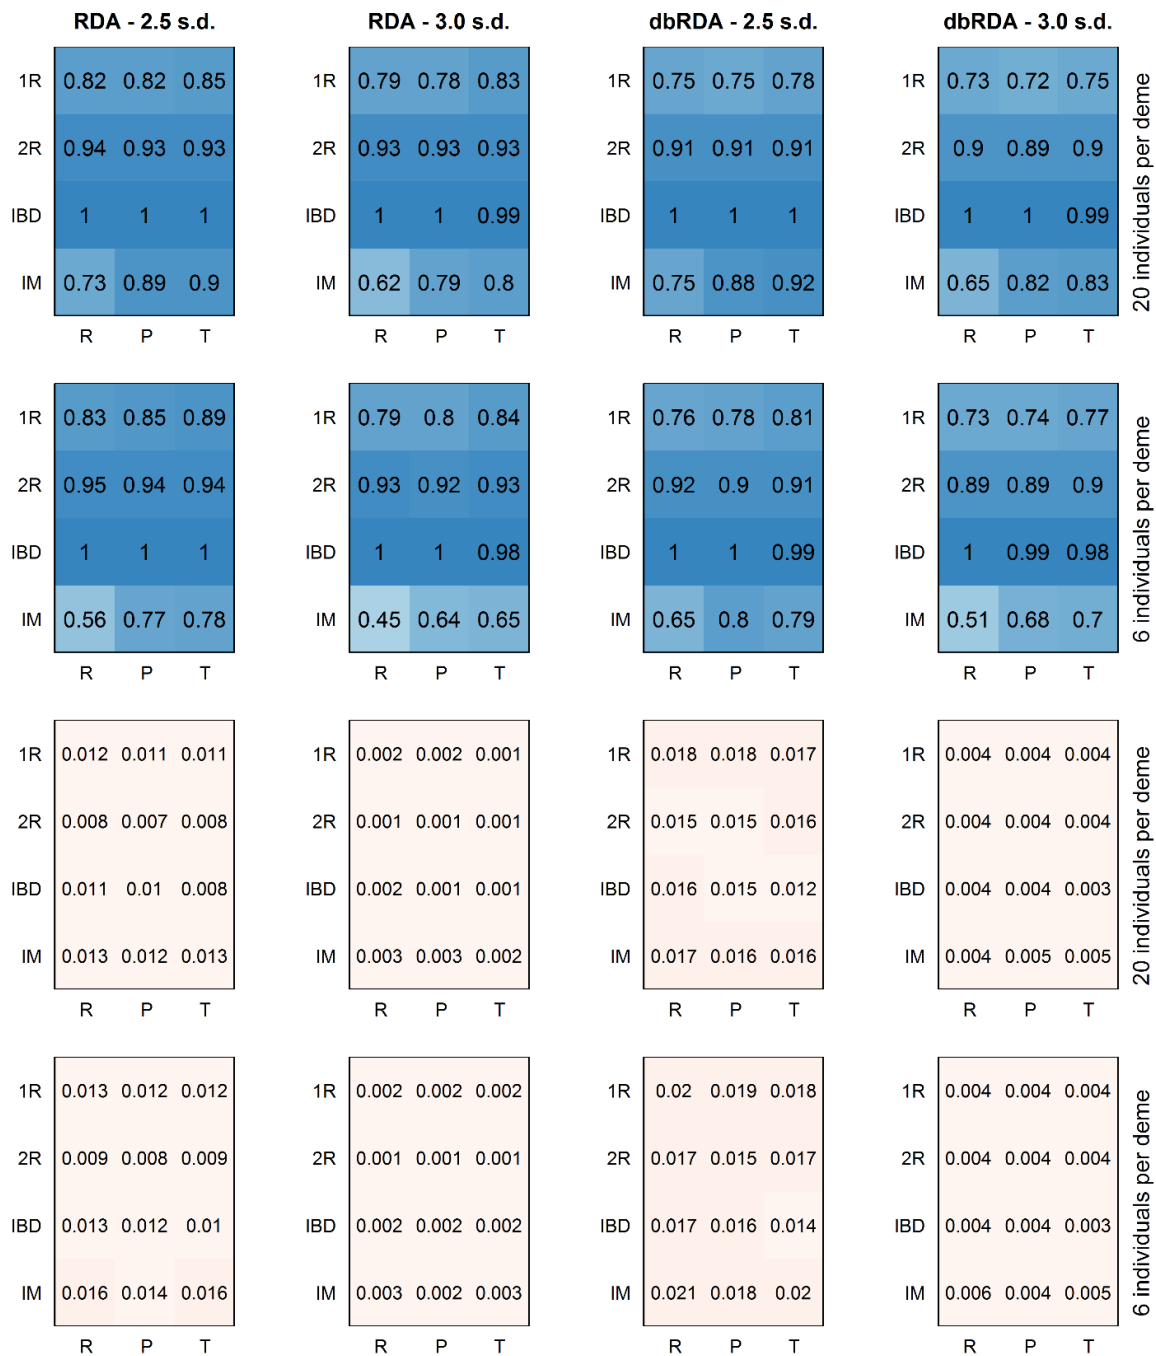

**Figure S5.** Average true positive (blue) and false positive (red) rates for constrained ordinations using  $\pm 2.5$  and  $3.0$  SD cutoffs. Each method and cutoff shows results for different sampling strategies (R = random, P = pairs, T = transects), demographies (1R and 2R = refugial expansion, IBD = equilibrium isolation by distance, IM = equilibrium island model), and sample sizes (rows).

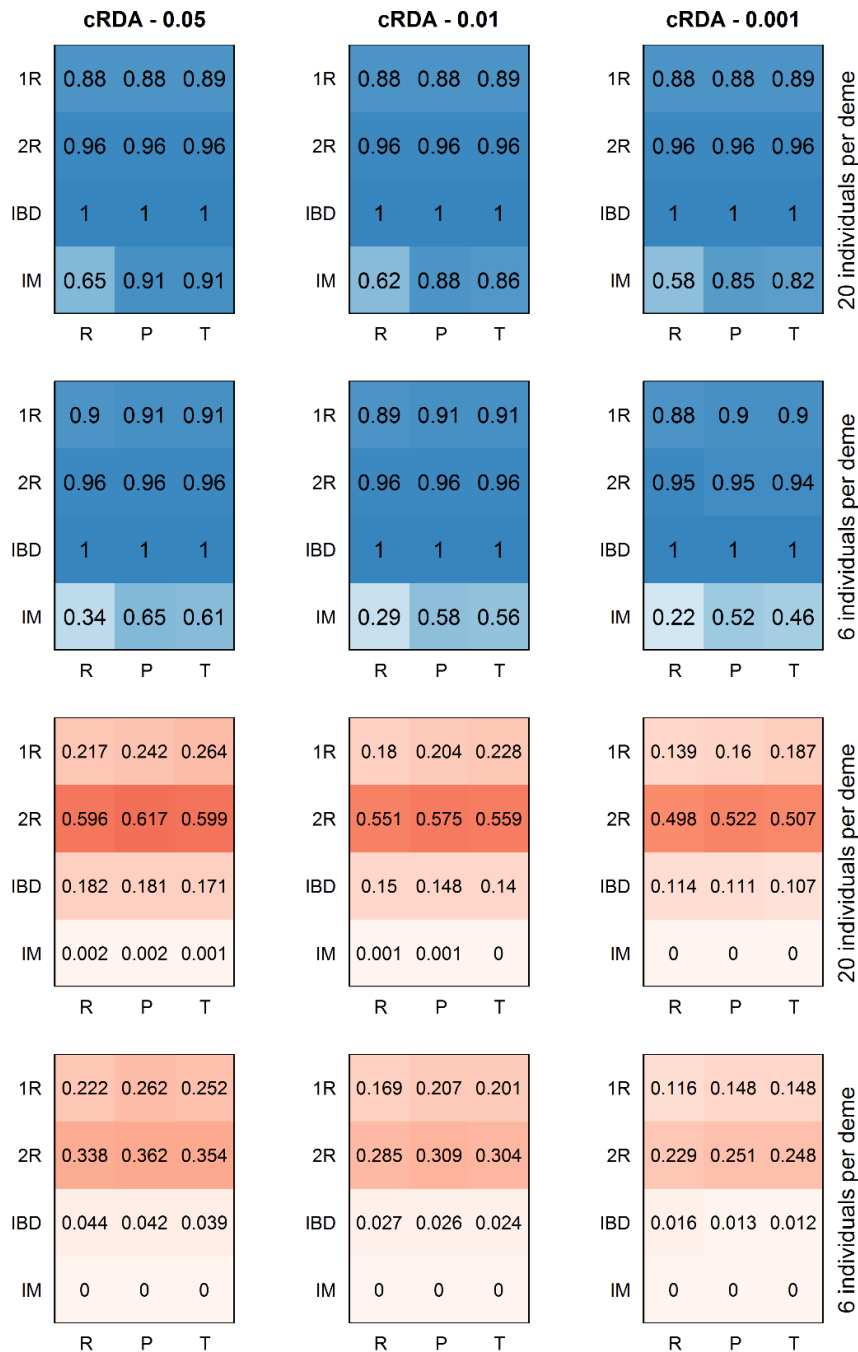

**Figure S6.** Average true positive (blue) and false positive (red) rates for cRDA using SNP-component correlation cutoffs of  $\alpha = 0.05$ ,  $0.01$ , and  $0.001$ . Each cutoff shows results for different sampling strategies (R = random, P = pairs, T = transects), demographies (1R and 2R = refugial expansion, IBD = equilibrium isolation by distance, IM = equilibrium island model), and sample sizes (rows).

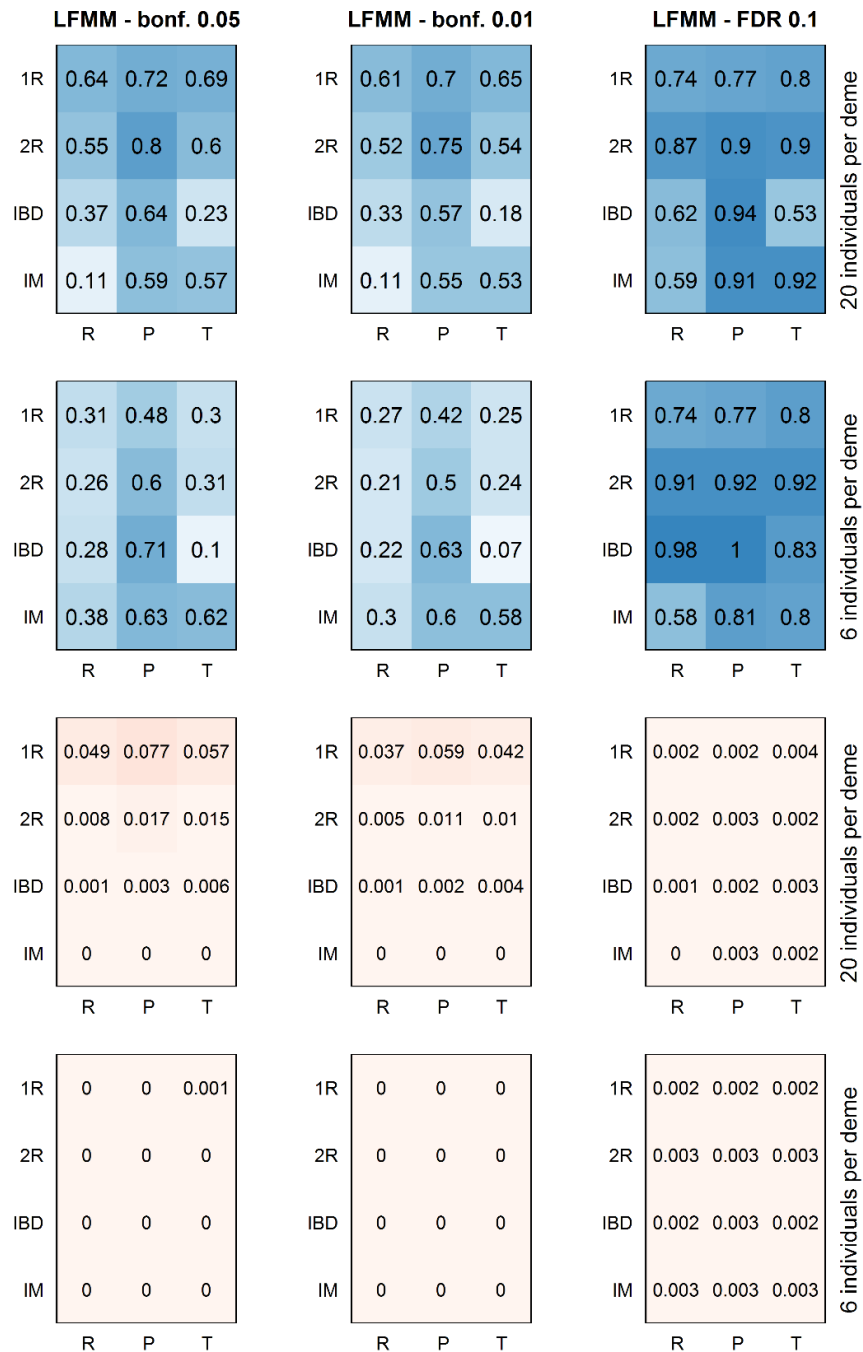

**Figure S7.** Average true positive (blue) and false positive (red) rates for LFMM using Bonferroni-corrected cutoffs of 0.05 and 0.01, and a false discovery rate cutoff of 0.1. Each cutoff shows results for different sampling strategies (R = random, P = pairs, T = transects), demographies (1R and 2R = refugial expansion, IBD = equilibrium isolation by distance, IM = equilibrium island model), and sample sizes (rows)

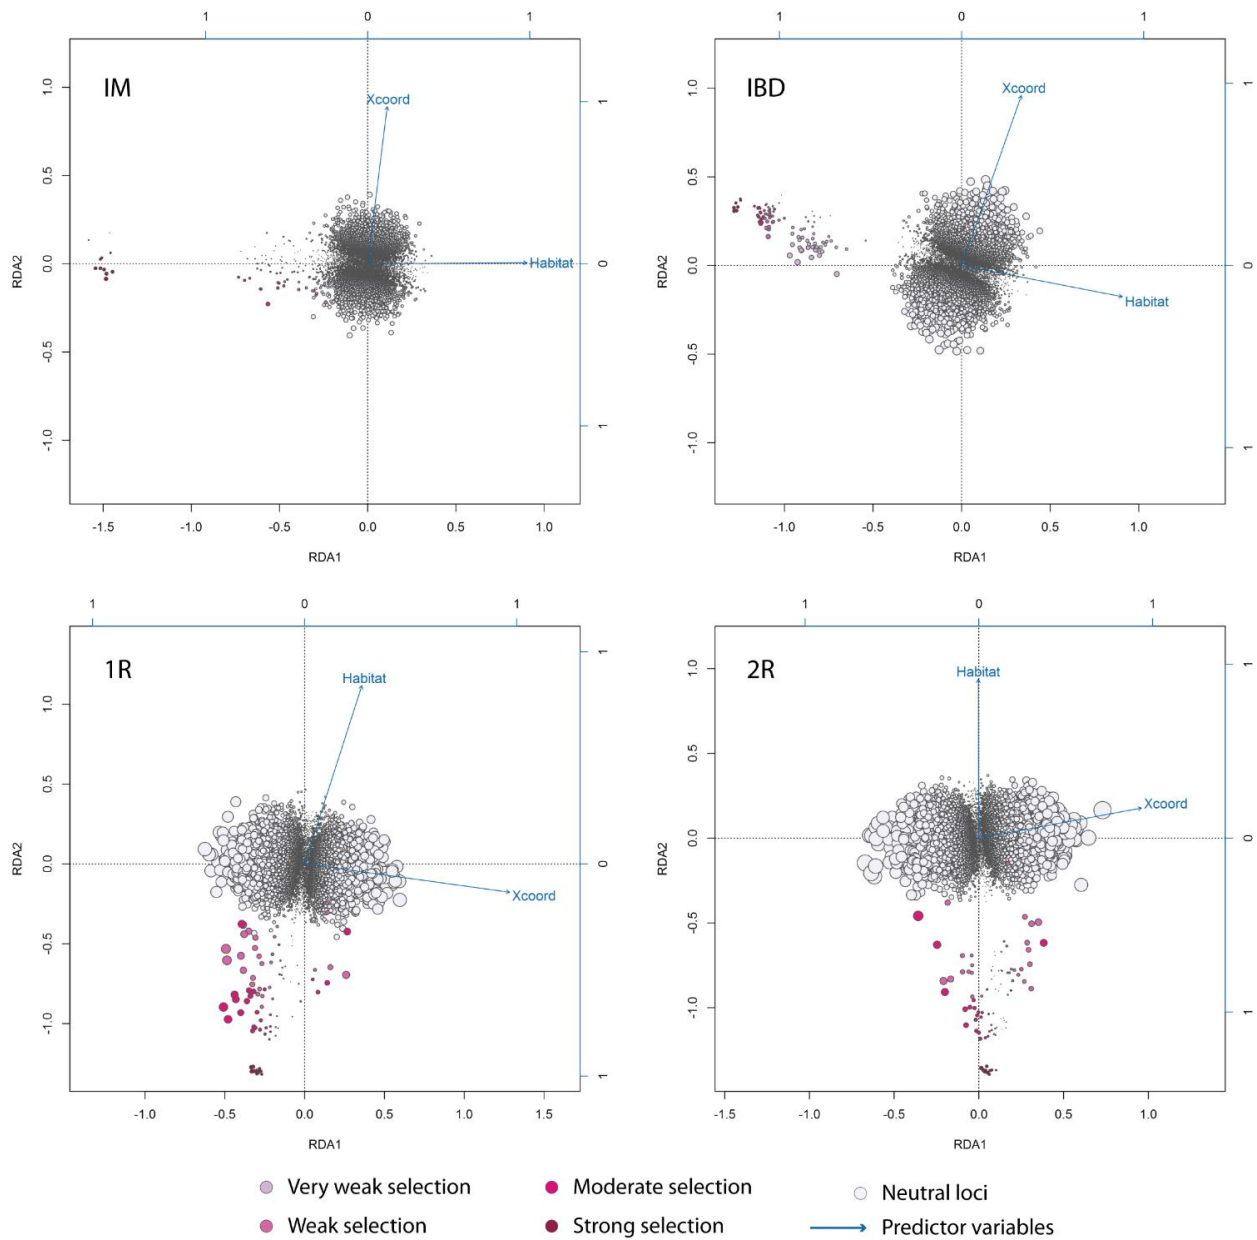

**Figure S8.** Redundancy analysis plots showing loci with point size scaled by their correlation with the spurious X-coordinate variable (“Xcoord”), and correlation of predictor variables with the constrained RDA axes (arrows). Plots are shown for an equilibrium island model (IM), equilibrium isolation by distance model (IBD), and non-equilibrium one- and two- refugial expansion models (1R and 2R) for paired sampling (6 individuals/deme) on environmental surface “453”.



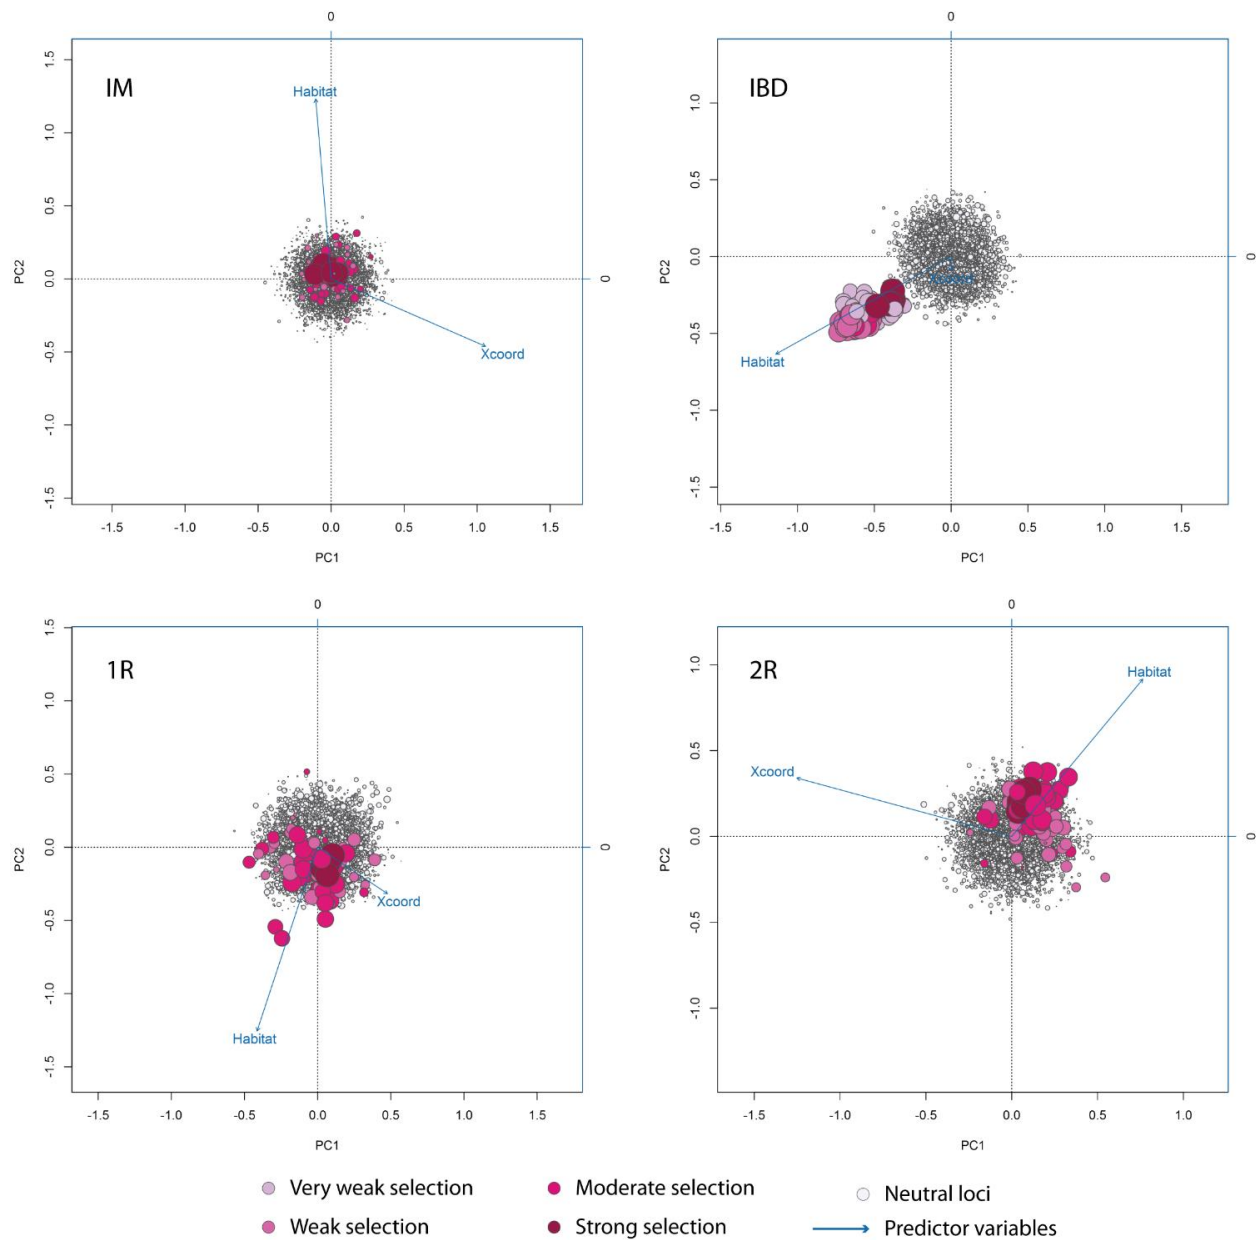

**Figure S9.** Plots of the first two unconstrained (PC) axes from redundancy analysis showing loci with point size scaled by their correlation with the driving environmental variable (“Habitat”), and correlation of predictor variables with the unconstrained PC axes (arrows). Plots are shown for an equilibrium island model (IM), equilibrium isolation by distance model (IBD), and non-equilibrium one- and two- refugial expansion models (1R and 2R) for paired sampling (6 individuals/deme) on environmental surface “453”.

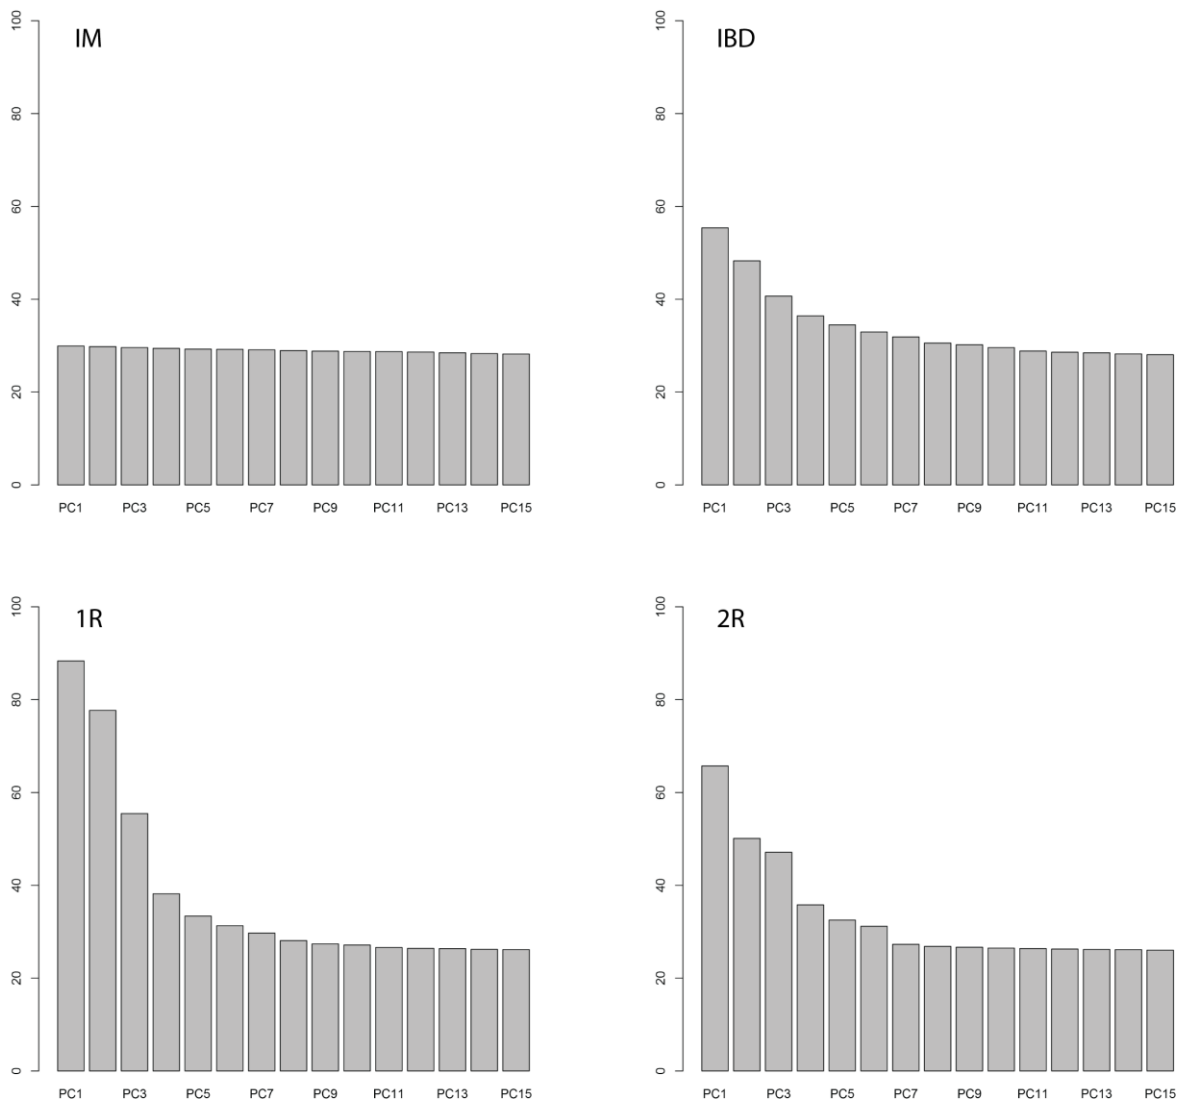

**Figure S10.** Screeplots of the eigenvalues for the first 15 (of 537 total) unconstrained (PC) axes from redundancy analysis. All screeplots use the same y-axis scale. Plots are shown for an equilibrium island model (IM), equilibrium isolation by distance model (IBD), and non-equilibrium one- and two- refugial expansion models (1R and 2R) for paired sampling (6 individuals/deme) on environmental surface “453”.

**Table S1:** Parameters from latent factor mixed model runs: values of K and genomic inflation factors (GIF) for habitat and x-coordinate predictors.

| Demography | Sampling Design | Envir. Surface | 6 individuals per deme |      |      | 20 individuals per deme |      |      |
|------------|-----------------|----------------|------------------------|------|------|-------------------------|------|------|
|            |                 |                | K                      | GIFh | GIFx | K                       | GIFh | GIFx |
| 1R         | R               | 453            | 5                      | 0.52 | 1.45 | 5                       | 1.12 | 5.42 |
| 1R         | R               | 950            | 5                      | 0.43 | 1.42 | 5                       | 0.98 | 5.19 |
| 1R         | R               | 988            | 5                      | 0.40 | 1.35 | 5                       | 1.07 | 5.37 |
| 1R         | P               | 453            | 5                      | 0.45 | 1.26 | 5                       | 0.86 | 6.70 |
| 1R         | P               | 950            | 5                      | 0.67 | 1.47 | 5                       | 1.26 | 8.32 |
| 1R         | P               | 988            | 5                      | 0.48 | 1.30 | 5                       | 1.00 | 6.97 |
| 1R         | T               | 453            | 5                      | 0.38 | 1.72 | 5                       | 0.89 | 7.45 |
| 1R         | T               | 950            | 5                      | 0.40 | 1.53 | 5                       | 0.88 | 5.61 |
| 1R         | T               | 988            | 5                      | 0.33 | 1.31 | 5                       | 0.64 | 5.83 |
| 2R         | R               | 453            | 5                      | 0.31 | 1.02 | 5                       | 0.81 | 2.46 |
| 2R         | R               | 950            | 5                      | 0.23 | 1.10 | 5                       | 0.57 | 2.93 |
| 2R         | R               | 988            | 5                      | 0.27 | 1.00 | 5                       | 0.64 | 2.96 |
| 2R         | P               | 453            | 5                      | 0.30 | 1.39 | 5                       | 0.62 | 2.98 |
| 2R         | P               | 950            | 5                      | 0.38 | 1.24 | 5                       | 0.59 | 4.27 |
| 2R         | P               | 988            | 5                      | 0.29 | 1.11 | 5                       | 0.71 | 4.01 |
| 2R         | T               | 453            | 5                      | 0.27 | 1.60 | 5                       | 0.54 | 4.46 |
| 2R         | T               | 950            | 5                      | 0.28 | 1.48 | 5                       | 0.71 | 3.06 |
| 2R         | T               | 988            | 5                      | 0.18 | 1.36 | 5                       | 0.42 | 2.85 |
| IBD        | R               | 453            | 4                      | 0.37 | 0.61 | 4                       | 1.13 | 2.05 |
| IBD        | R               | 950            | 4                      | 0.37 | 0.60 | 4                       | 1.27 | 2.02 |
| IBD        | R               | 988            | 4                      | 0.39 | 0.59 | 4                       | 1.07 | 1.94 |
| IBD        | P               | 453            | 4                      | 0.40 | 0.62 | 4                       | 0.97 | 1.97 |
| IBD        | P               | 950            | 4                      | 0.44 | 0.78 | 4                       | 1.10 | 2.67 |
| IBD        | P               | 988            | 4                      | 0.39 | 0.65 | 4                       | 1.01 | 2.23 |
| IBD        | T               | 453            | 4                      | 0.46 | 0.88 | 4                       | 1.26 | 2.85 |
| IBD        | T               | 950            | 4                      | 0.34 | 0.66 | 4                       | 0.75 | 2.68 |
| IBD        | T               | 988            | 4                      | 0.38 | 0.68 | 4                       | 0.97 | 2.50 |
| IM         | R               | 453            | 1                      | 1.14 | 1.14 | 4                       | 0.27 | 0.30 |
| IM         | R               | 950            | 1                      | 1.13 | 1.15 | 4                       | 0.22 | 0.29 |
| IM         | R               | 988            | 1                      | 1.13 | 1.12 | 4                       | 0.25 | 0.30 |
| IM         | P               | 453            | 1                      | 1.16 | 1.05 | 2                       | 0.58 | 0.85 |
| IM         | P               | 950            | 1                      | 1.12 | 1.07 | 2                       | 0.61 | 0.72 |
| IM         | P               | 988            | 1                      | 1.13 | 1.08 | 2                       | 0.65 | 0.91 |
| IM         | T               | 453            | 1                      | 1.09 | 1.06 | 2                       | 0.65 | 0.85 |
| IM         | T               | 950            | 1                      | 1.11 | 1.06 | 2                       | 0.73 | 0.87 |
| IM         | T               | 988            | 1                      | 1.09 | 1.11 | 2                       | 0.60 | 0.88 |

**Table S2:** Correlations between habitat and x- and y-coordinates of demes for each simulation; average and maximum trend in neutral markers; average and maximum levels of local adaptation.

| Demo-<br>graphy | De-<br>sign | Env | Correlations:    |                  | Neutral trend:<br>6 indiv./deme |      | Neutral trend:<br>20 indiv./deme |      | Local adaptation:<br>6 indiv./deme |      | Local adaptation:<br>20 indiv./deme |      |
|-----------------|-------------|-----|------------------|------------------|---------------------------------|------|----------------------------------|------|------------------------------------|------|-------------------------------------|------|
|                 |             |     | Habitat<br>and X | Habitat<br>and Y | Avg.                            | Max. | Avg.                             | Max. | Avg.                               | Max. | Avg.                                | Max. |
| 1R              | R           | 453 | 0.00             | 0.65             | 0.11                            | 0.61 | 0.20                             | 0.79 | 0.49                               | 0.76 | 0.55                                | 0.80 |
| 1R              | R           | 950 | 0.05             | 0.63             | 0.11                            | 0.63 | 0.20                             | 0.80 | 0.37                               | 0.68 | 0.42                                | 0.70 |
| 1R              | R           | 988 | 0.03             | 0.55             | 0.11                            | 0.64 | 0.20                             | 0.80 | 0.36                               | 0.65 | 0.42                                | 0.67 |
| 1R              | P           | 453 | 0.00             | 0.84             | 0.12                            | 0.64 | 0.21                             | 0.80 | 0.52                               | 0.80 | 0.57                                | 0.80 |
| 1R              | P           | 950 | 0.00             | 0.69             | 0.13                            | 0.68 | 0.22                             | 0.83 | 0.52                               | 0.83 | 0.56                                | 0.83 |
| 1R              | P           | 988 | -0.11            | 0.70             | 0.12                            | 0.62 | 0.21                             | 0.82 | 0.44                               | 0.83 | 0.50                                | 0.84 |
| 1R              | T           | 453 | 0.13             | 0.82             | 0.13                            | 0.67 | 0.23                             | 0.84 | 0.42                               | 0.70 | 0.46                                | 0.71 |
| 1R              | T           | 950 | 0.12             | 0.83             | 0.12                            | 0.68 | 0.22                             | 0.84 | 0.38                               | 0.73 | 0.42                                | 0.76 |
| 1R              | T           | 988 | -0.14            | 0.78             | 0.12                            | 0.60 | 0.21                             | 0.80 | 0.36                               | 0.70 | 0.41                                | 0.73 |
| 2R              | R           | 453 | 0.00             | 0.65             | 0.14                            | 0.71 | 0.25                             | 0.83 | 0.55                               | 0.74 | 0.62                                | 0.75 |
| 2R              | R           | 950 | 0.05             | 0.63             | 0.13                            | 0.70 | 0.24                             | 0.83 | 0.45                               | 0.67 | 0.51                                | 0.68 |
| 2R              | R           | 988 | 0.03             | 0.55             | 0.14                            | 0.69 | 0.25                             | 0.83 | 0.42                               | 0.68 | 0.49                                | 0.70 |
| 2R              | P           | 453 | 0.00             | 0.84             | 0.14                            | 0.70 | 0.25                             | 0.85 | 0.58                               | 0.80 | 0.64                                | 0.81 |
| 2R              | P           | 950 | 0.00             | 0.69             | 0.14                            | 0.76 | 0.26                             | 0.85 | 0.61                               | 0.83 | 0.66                                | 0.84 |
| 2R              | P           | 988 | -0.11            | 0.70             | 0.15                            | 0.73 | 0.26                             | 0.84 | 0.54                               | 0.83 | 0.61                                | 0.84 |
| 2R              | T           | 453 | 0.13             | 0.82             | 0.15                            | 0.80 | 0.27                             | 0.91 | 0.49                               | 0.71 | 0.55                                | 0.73 |
| 2R              | T           | 950 | 0.12             | 0.83             | 0.14                            | 0.70 | 0.26                             | 0.87 | 0.45                               | 0.74 | 0.51                                | 0.76 |
| 2R              | T           | 988 | -0.14            | 0.78             | 0.14                            | 0.70 | 0.26                             | 0.82 | 0.41                               | 0.71 | 0.48                                | 0.71 |
| IBD             | R           | 453 | 0.00             | 0.65             | 0.06                            | 0.42 | 0.11                             | 0.58 | 0.61                               | 0.72 | 0.65                                | 0.74 |
| IBD             | R           | 950 | 0.05             | 0.63             | 0.06                            | 0.43 | 0.10                             | 0.59 | 0.48                               | 0.68 | 0.52                                | 0.69 |
| IBD             | R           | 988 | 0.03             | 0.55             | 0.06                            | 0.41 | 0.10                             | 0.56 | 0.44                               | 0.68 | 0.48                                | 0.69 |
| IBD             | P           | 453 | 0.00             | 0.84             | 0.06                            | 0.43 | 0.11                             | 0.56 | 0.63                               | 0.81 | 0.68                                | 0.82 |
| IBD             | P           | 950 | 0.00             | 0.69             | 0.07                            | 0.44 | 0.11                             | 0.63 | 0.68                               | 0.83 | 0.72                                | 0.83 |
| IBD             | P           | 988 | -0.11            | 0.70             | 0.06                            | 0.41 | 0.10                             | 0.57 | 0.60                               | 0.83 | 0.64                                | 0.84 |
| IBD             | T           | 453 | 0.13             | 0.82             | 0.07                            | 0.47 | 0.12                             | 0.63 | 0.43                               | 0.71 | 0.46                                | 0.71 |
| IBD             | T           | 950 | 0.12             | 0.83             | 0.06                            | 0.56 | 0.10                             | 0.69 | 0.42                               | 0.71 | 0.46                                | 0.72 |
| IBD             | T           | 988 | -0.14            | 0.78             | 0.07                            | 0.41 | 0.11                             | 0.58 | 0.35                               | 0.69 | 0.37                                | 0.69 |
| IM              | R           | 453 | 0.00             | 0.65             | 0.02                            | 0.25 | 0.02                             | 0.22 | 0.17                               | 0.74 | 0.26                                | 0.79 |
| IM              | R           | 950 | 0.05             | 0.63             | 0.02                            | 0.18 | 0.02                             | 0.20 | 0.16                               | 0.76 | 0.24                                | 0.82 |
| IM              | R           | 988 | 0.03             | 0.55             | 0.02                            | 0.25 | 0.02                             | 0.28 | 0.18                               | 0.72 | 0.26                                | 0.77 |
| IM              | P           | 453 | 0.00             | 0.84             | 0.02                            | 0.17 | 0.02                             | 0.18 | 0.26                               | 0.82 | 0.38                                | 0.87 |
| IM              | P           | 950 | 0.00             | 0.69             | 0.02                            | 0.20 | 0.02                             | 0.22 | 0.27                               | 0.85 | 0.40                                | 0.87 |
| IM              | P           | 988 | -0.11            | 0.70             | 0.02                            | 0.20 | 0.02                             | 0.20 | 0.26                               | 0.82 | 0.39                                | 0.86 |
| IM              | T           | 453 | 0.13             | 0.82             | 0.02                            | 0.21 | 0.02                             | 0.18 | 0.25                               | 0.76 | 0.38                                | 0.81 |
| IM              | T           | 950 | 0.12             | 0.83             | 0.02                            | 0.19 | 0.02                             | 0.21 | 0.24                               | 0.82 | 0.36                                | 0.84 |
| IM              | T           | 988 | -0.14            | 0.78             | 0.02                            | 0.27 | 0.02                             | 0.22 | 0.25                               | 0.80 | 0.37                                | 0.83 |

**Table S3:** Detection rates (using locus rankings) for simulation scenarios (6 individuals sampled per deme) with and without correction for population structure.

| Demography | Design | Env | True Positive Rates |          |        |             |      |           |      |         | False Positive Rates |          |        |             |      |           |      |         |
|------------|--------|-----|---------------------|----------|--------|-------------|------|-----------|------|---------|----------------------|----------|--------|-------------|------|-----------|------|---------|
|            |        |     | RDA                 | RDA corr | db RDA | db RDA corr | cRDA | cRDA corr | RF   | RF corr | RDA                  | RDA corr | db RDA | db RDA corr | cRDA | cRDA corr | RF   | RF corr |
| 1R         | R      | 453 | 0.82                | 0.81     | 0.73   | 0.72        | 0.78 | 0.78      | 0.29 | 0.09    | 0.18                 | 0.19     | 0.27   | 0.28        | 0.22 | 0.22      | 0.71 | 0.91    |
| 1R         | R      | 950 | 0.75                | 0.74     | 0.70   | 0.71        | 0.75 | 0.75      | 0.24 | 0.09    | 0.25                 | 0.26     | 0.30   | 0.29        | 0.25 | 0.25      | 0.76 | 0.91    |
| 1R         | R      | 988 | 0.80                | 0.80     | 0.71   | 0.69        | 0.80 | 0.80      | 0.26 | 0.11    | 0.20                 | 0.20     | 0.29   | 0.31        | 0.20 | 0.20      | 0.74 | 0.38    |
| 1R         | P      | 453 | 0.83                | 0.84     | 0.76   | 0.75        | 0.85 | 0.85      | 0.26 | 0.17    | 0.17                 | 0.16     | 0.24   | 0.25        | 0.15 | 0.15      | 0.74 | 0.83    |
| 1R         | P      | 950 | 0.79                | 0.79     | 0.74   | 0.75        | 0.76 | 0.76      | 0.30 | 0.10    | 0.21                 | 0.21     | 0.26   | 0.25        | 0.24 | 0.24      | 0.70 | 0.90    |
| 1R         | P      | 988 | 0.76                | 0.76     | 0.67   | 0.67        | 0.74 | 0.74      | 0.24 | 0.10    | 0.24                 | 0.24     | 0.33   | 0.33        | 0.26 | 0.26      | 0.76 | 0.90    |
| 1R         | T      | 453 | 0.90                | 0.91     | 0.80   | 0.78        | 0.87 | 0.87      | 0.26 | 0.13    | 0.10                 | 0.09     | 0.20   | 0.22        | 0.13 | 0.13      | 0.74 | 0.87    |
| 1R         | T      | 950 | 0.76                | 0.79     | 0.71   | 0.71        | 0.76 | 0.76      | 0.23 | 0.12    | 0.24                 | 0.21     | 0.29   | 0.29        | 0.24 | 0.24      | 0.77 | 0.88    |
| 1R         | T      | 988 | 0.86                | 0.88     | 0.75   | 0.74        | 0.83 | 0.83      | 0.22 | 0.12    | 0.14                 | 0.12     | 0.25   | 0.26        | 0.17 | 0.17      | 0.78 | 0.88    |
| 2R         | R      | 453 | 0.94                | 0.94     | 0.90   | 0.89        | 0.94 | 0.94      | 0.30 | 0.10    | 0.06                 | 0.06     | 0.10   | 0.11        | 0.06 | 0.06      | 0.70 | 0.90    |
| 2R         | R      | 950 | 0.93                | 0.93     | 0.88   | 0.88        | 0.90 | 0.90      | 0.31 | 0.14    | 0.07                 | 0.07     | 0.12   | 0.12        | 0.10 | 0.10      | 0.69 | 0.86    |
| 2R         | R      | 988 | 0.91                | 0.88     | 0.85   | 0.81        | 0.91 | 0.91      | 0.22 | 0.09    | 0.09                 | 0.12     | 0.15   | 0.19        | 0.09 | 0.09      | 0.78 | 0.91    |
| 2R         | P      | 453 | 0.92                | 0.93     | 0.86   | 0.87        | 0.92 | 0.92      | 0.28 | 0.18    | 0.08                 | 0.07     | 0.14   | 0.13        | 0.08 | 0.08      | 0.72 | 0.82    |
| 2R         | P      | 950 | 0.93                | 0.93     | 0.89   | 0.89        | 0.93 | 0.93      | 0.32 | 0.12    | 0.07                 | 0.07     | 0.11   | 0.11        | 0.07 | 0.07      | 0.68 | 0.88    |
| 2R         | P      | 988 | 0.90                | 0.91     | 0.86   | 0.86        | 0.91 | 0.91      | 0.26 | 0.12    | 0.10                 | 0.09     | 0.14   | 0.14        | 0.09 | 0.09      | 0.74 | 0.88    |
| 2R         | T      | 453 | 0.95                | 0.95     | 0.89   | 0.89        | 0.94 | 0.94      | 0.33 | 0.15    | 0.05                 | 0.05     | 0.11   | 0.11        | 0.06 | 0.06      | 0.67 | 0.85    |
| 2R         | T      | 950 | 0.91                | 0.91     | 0.87   | 0.86        | 0.90 | 0.90      | 0.21 | 0.10    | 0.09                 | 0.09     | 0.13   | 0.14        | 0.10 | 0.10      | 0.79 | 0.90    |
| 2R         | T      | 988 | 0.93                | 0.92     | 0.87   | 0.86        | 0.92 | 0.92      | 0.21 | 0.10    | 0.07                 | 0.08     | 0.13   | 0.14        | 0.08 | 0.08      | 0.79 | 0.90    |
| IBD        | R      | 453 | 1.00                | 1.00     | 0.98   | 0.98        | 1.00 | 1.00      | 0.27 | 0.07    | 0.00                 | 0.00     | 0.02   | 0.02        | 0.00 | 0.00      | 0.73 | 0.93    |
| IBD        | R      | 950 | 0.98                | 0.98     | 0.97   | 0.96        | 0.99 | 0.99      | 0.31 | 0.06    | 0.02                 | 0.02     | 0.03   | 0.04        | 0.01 | 0.01      | 0.69 | 0.94    |
| IBD        | R      | 988 | 1.00                | 1.00     | 0.98   | 0.98        | 1.00 | 1.00      | 0.37 | 0.08    | 0.00                 | 0.00     | 0.02   | 0.02        | 0.00 | 0.00      | 0.63 | 0.92    |
| IBD        | P      | 453 | 0.99                | 0.99     | 0.98   | 0.98        | 1.00 | 1.00      | 0.27 | 0.10    | 0.01                 | 0.01     | 0.02   | 0.02        | 0.00 | 0.00      | 0.73 | 0.90    |
| IBD        | P      | 950 | 0.99                | 0.99     | 0.98   | 0.98        | 0.99 | 0.99      | 0.28 | 0.08    | 0.01                 | 0.01     | 0.02   | 0.02        | 0.01 | 0.01      | 0.72 | 0.92    |
| IBD        | P      | 988 | 1.00                | 1.00     | 0.99   | 0.99        | 1.00 | 1.00      | 0.21 | 0.09    | 0.00                 | 0.00     | 0.01   | 0.01        | 0.00 | 0.00      | 0.79 | 0.91    |
| IBD        | T      | 453 | 0.94                | 0.94     | 0.94   | 0.94        | 1.00 | 1.00      | 0.14 | 0.07    | 0.06                 | 0.06     | 0.06   | 0.06        | 0.00 | 0.00      | 0.86 | 0.93    |
| IBD        | T      | 950 | 0.97                | 0.96     | 0.90   | 0.93        | 0.98 | 0.98      | 0.24 | 0.11    | 0.03                 | 0.04     | 0.10   | 0.07        | 0.02 | 0.02      | 0.76 | 0.89    |
| IBD        | T      | 988 | 0.98                | 0.96     | 0.97   | 0.97        | 0.98 | 0.98      | 0.10 | 0.07    | 0.02                 | 0.04     | 0.03   | 0.03        | 0.02 | 0.02      | 0.90 | 0.93    |
| IM         | R      | 453 | 0.50                | NA       | 0.51   | NA          | 0.49 | NA        | 0.19 | 0.21    | 0.50                 | NA       | 0.49   | NA          | 0.51 | NA        | 0.81 | 0.79    |
| IM         | R      | 950 | 0.44                | NA       | 0.47   | NA          | 0.46 | NA        | 0.10 | 0.14    | 0.56                 | NA       | 0.53   | NA          | 0.54 | NA        | 0.90 | 0.86    |
| IM         | R      | 988 | 0.51                | NA       | 0.54   | NA          | 0.54 | NA        | 0.15 | 0.15    | 0.49                 | NA       | 0.46   | NA          | 0.46 | NA        | 0.85 | 0.85    |
| IM         | P      | 453 | 0.66                | NA       | 0.66   | NA          | 0.73 | NA        | 0.20 | 0.30    | 0.34                 | NA       | 0.34   | NA          | 0.27 | NA        | 0.80 | 0.69    |
| IM         | P      | 950 | 0.67                | NA       | 0.67   | NA          | 0.68 | NA        | 0.18 | 0.22    | 0.33                 | NA       | 0.33   | NA          | 0.32 | NA        | 0.82 | 0.78    |
| IM         | P      | 988 | 0.68                | NA       | 0.68   | NA          | 0.61 | NA        | 0.19 | 0.18    | 0.32                 | NA       | 0.32   | NA          | 0.39 | NA        | 0.81 | 0.82    |
| IM         | T      | 453 | 0.70                | NA       | 0.70   | NA          | 0.69 | NA        | 0.19 | 0.26    | 0.30                 | NA       | 0.30   | NA          | 0.31 | NA        | 0.81 | 0.74    |
| IM         | T      | 950 | 0.63                | NA       | 0.65   | NA          | 0.72 | NA        | 0.16 | 0.16    | 0.37                 | NA       | 0.35   | NA          | 0.28 | NA        | 0.84 | 0.84    |
| IM         | T      | 988 | 0.67                | NA       | 0.69   | NA          | 0.73 | NA        | 0.20 | 0.30    | 0.33                 | NA       | 0.31   | NA          | 0.27 | NA        | 0.80 | 0.70    |

**Table S4:** Detection rates (using locus rankings) for simulation scenarios (20 individuals sampled per deme) with and without correction for population structure.

| Demography | Design | Env | True Positive Rates |          |        |             |      |           |      |         | False Positive Rates |          |        |             |      |           |      |         |
|------------|--------|-----|---------------------|----------|--------|-------------|------|-----------|------|---------|----------------------|----------|--------|-------------|------|-----------|------|---------|
|            |        |     | RDA                 | RDA corr | db RDA | db RDA corr | cRDA | cRDA corr | RF   | RF corr | RDA                  | RDA corr | db RDA | db RDA corr | cRDA | cRDA corr | RF   | RF corr |
| 1R         | R      | 453 | 0.80                | 0.80     | 0.74   | 0.74        | 0.85 | 0.85      | 0.17 | 0.10    | 0.20                 | 0.20     | 0.26   | 0.26        | 0.15 | 0.15      | 0.83 | 0.90    |
| 1R         | R      | 950 | 0.74                | 0.74     | 0.68   | 0.68        | 0.76 | 0.76      | 0.21 | 0.11    | 0.26                 | 0.26     | 0.32   | 0.32        | 0.24 | 0.24      | 0.79 | 0.89    |
| 1R         | R      | 988 | 0.81                | 0.80     | 0.73   | 0.72        | 0.82 | 0.82      | 0.24 | 0.13    | 0.19                 | 0.20     | 0.27   | 0.28        | 0.18 | 0.18      | 0.76 | 0.88    |
| 1R         | P      | 453 | 0.83                | 0.84     | 0.76   | 0.76        | 0.86 | 0.86      | 0.30 | 0.22    | 0.17                 | 0.16     | 0.24   | 0.24        | 0.14 | 0.14      | 0.70 | 0.78    |
| 1R         | P      | 950 | 0.74                | 0.75     | 0.70   | 0.70        | 0.77 | 0.77      | 0.19 | 0.10    | 0.26                 | 0.25     | 0.30   | 0.30        | 0.23 | 0.23      | 0.81 | 0.90    |
| 1R         | P      | 988 | 0.78                | 0.78     | 0.68   | 0.68        | 0.79 | 0.79      | 0.23 | 0.18    | 0.22                 | 0.22     | 0.32   | 0.32        | 0.21 | 0.21      | 0.77 | 0.82    |
| 1R         | T      | 453 | 0.88                | 0.88     | 0.78   | 0.78        | 0.85 | 0.85      | 0.33 | 0.16    | 0.12                 | 0.12     | 0.22   | 0.22        | 0.15 | 0.15      | 0.67 | 0.84    |
| 1R         | T      | 950 | 0.78                | 0.78     | 0.69   | 0.69        | 0.79 | 0.79      | 0.37 | 0.18    | 0.22                 | 0.22     | 0.31   | 0.31        | 0.21 | 0.21      | 0.63 | 0.82    |
| 1R         | T      | 988 | 0.85                | 0.85     | 0.73   | 0.73        | 0.84 | 0.84      | 0.32 | 0.14    | 0.15                 | 0.15     | 0.27   | 0.27        | 0.16 | 0.16      | 0.68 | 0.86    |
| 2R         | R      | 453 | 0.93                | 0.94     | 0.90   | 0.89        | 0.93 | 0.93      | 0.43 | 0.21    | 0.07                 | 0.06     | 0.10   | 0.11        | 0.07 | 0.07      | 0.57 | 0.79    |
| 2R         | R      | 950 | 0.91                | 0.91     | 0.88   | 0.88        | 0.88 | 0.88      | 0.28 | 0.11    | 0.09                 | 0.09     | 0.12   | 0.12        | 0.12 | 0.12      | 0.72 | 0.89    |
| 2R         | R      | 988 | 0.93                | 0.93     | 0.86   | 0.86        | 0.91 | 0.91      | 0.16 | 0.09    | 0.07                 | 0.07     | 0.14   | 0.14        | 0.09 | 0.09      | 0.84 | 0.91    |
| 2R         | P      | 453 | 0.93                | 0.93     | 0.88   | 0.87        | 0.91 | 0.91      | 0.33 | 0.23    | 0.07                 | 0.07     | 0.12   | 0.13        | 0.09 | 0.09      | 0.67 | 0.77    |
| 2R         | P      | 950 | 0.91                | 0.91     | 0.87   | 0.87        | 0.91 | 0.91      | 0.25 | 0.19    | 0.09                 | 0.09     | 0.13   | 0.13        | 0.09 | 0.09      | 0.75 | 0.81    |
| 2R         | P      | 988 | 0.93                | 0.93     | 0.87   | 0.87        | 0.91 | 0.91      | 0.07 | 0.16    | 0.07                 | 0.07     | 0.13   | 0.13        | 0.09 | 0.09      | 0.93 | 0.84    |
| 2R         | T      | 453 | 0.95                | 0.95     | 0.89   | 0.89        | 0.92 | 0.92      | 0.39 | 0.19    | 0.05                 | 0.05     | 0.11   | 0.11        | 0.08 | 0.08      | 0.61 | 0.81    |
| 2R         | T      | 950 | 0.89                | 0.89     | 0.86   | 0.86        | 0.89 | 0.89      | 0.28 | 0.12    | 0.11                 | 0.11     | 0.14   | 0.14        | 0.11 | 0.11      | 0.72 | 0.88    |
| 2R         | T      | 988 | 0.95                | 0.95     | 0.89   | 0.89        | 0.93 | 0.93      | 0.23 | 0.08    | 0.05                 | 0.05     | 0.11   | 0.11        | 0.07 | 0.07      | 0.77 | 0.92    |
| IBD        | R      | 453 | 1.00                | 1.00     | 0.98   | 0.98        | 1.00 | 1.00      | 0.29 | 0.12    | 0.00                 | 0.00     | 0.02   | 0.02        | 0.00 | 0.00      | 0.71 | 0.88    |
| IBD        | R      | 950 | 0.99                | 0.99     | 0.98   | 0.98        | 0.99 | 0.99      | 0.22 | 0.10    | 0.01                 | 0.01     | 0.02   | 0.02        | 0.01 | 0.01      | 0.78 | 0.90    |
| IBD        | R      | 988 | 1.00                | 1.00     | 0.99   | 0.99        | 1.00 | 1.00      | 0.24 | 0.11    | 0.00                 | 0.00     | 0.01   | 0.01        | 0.00 | 0.00      | 0.76 | 0.89    |
| IBD        | P      | 453 | 1.00                | 1.00     | 0.98   | 0.98        | 1.00 | 1.00      | 0.16 | 0.08    | 0.00                 | 0.00     | 0.02   | 0.02        | 0.00 | 0.00      | 0.84 | 0.92    |
| IBD        | P      | 950 | 0.99                | 0.99     | 0.98   | 0.98        | 0.99 | 0.99      | 0.39 | 0.21    | 0.01                 | 0.01     | 0.02   | 0.02        | 0.01 | 0.01      | 0.61 | 0.79    |
| IBD        | P      | 988 | 1.00                | 1.00     | 0.99   | 0.99        | 1.00 | 1.00      | 0.30 | 0.16    | 0.00                 | 0.00     | 0.01   | 0.01        | 0.00 | 0.00      | 0.70 | 0.84    |
| IBD        | T      | 453 | 0.98                | 0.98     | 0.96   | 0.96        | 1.00 | 1.00      | 0.28 | 0.07    | 0.02                 | 0.02     | 0.04   | 0.04        | 0.00 | 0.00      | 0.72 | 0.93    |
| IBD        | T      | 950 | 0.98                | 0.98     | 0.96   | 0.96        | 0.99 | 0.99      | 0.29 | 0.12    | 0.02                 | 0.02     | 0.04   | 0.04        | 0.01 | 0.01      | 0.71 | 0.88    |
| IBD        | T      | 988 | 0.99                | 0.99     | 0.98   | 0.97        | 1.00 | 1.00      | 0.09 | 0.12    | 0.01                 | 0.01     | 0.02   | 0.03        | 0.00 | 0.00      | 0.91 | 0.88    |
| IM         | R      | 453 | 0.64                | NA       | 0.64   | NA          | 0.72 | NA        | 0.09 | 0.08    | 0.36                 | NA       | 0.36   | NA          | 0.28 | NA        | 0.91 | 0.92    |
| IM         | R      | 950 | 0.61                | NA       | 0.62   | NA          | 0.66 | NA        | 0.08 | 0.07    | 0.39                 | NA       | 0.38   | NA          | 0.34 | NA        | 0.92 | 0.93    |
| IM         | R      | 988 | 0.68                | NA       | 0.68   | NA          | 0.66 | NA        | 0.09 | 0.07    | 0.32                 | NA       | 0.32   | NA          | 0.34 | NA        | 0.91 | 0.93    |
| IM         | P      | 453 | 0.77                | NA       | 0.75   | NA          | 0.92 | NA        | 0.10 | 0.08    | 0.23                 | NA       | 0.25   | NA          | 0.08 | NA        | 0.90 | 0.92    |
| IM         | P      | 950 | 0.80                | NA       | 0.79   | NA          | 0.86 | NA        | 0.12 | 0.09    | 0.20                 | NA       | 0.21   | NA          | 0.14 | NA        | 0.88 | 0.91    |
| IM         | P      | 988 | 0.77                | NA       | 0.79   | NA          | 0.85 | NA        | 0.09 | 0.06    | 0.23                 | NA       | 0.21   | NA          | 0.15 | NA        | 0.91 | 0.94    |
| IM         | T      | 453 | 0.80                | NA       | 0.79   | NA          | 0.93 | NA        | 0.10 | 0.07    | 0.20                 | NA       | 0.21   | NA          | 0.07 | NA        | 0.90 | 0.93    |
| IM         | T      | 950 | 0.77                | NA       | 0.73   | NA          | 0.84 | NA        | 0.10 | 0.08    | 0.23                 | NA       | 0.27   | NA          | 0.16 | NA        | 0.90 | 0.92    |
| IM         | T      | 988 | 0.80                | NA       | 0.77   | NA          | 0.71 | NA        | 0.16 | 0.10    | 0.20                 | NA       | 0.23   | NA          | 0.29 | NA        | 0.84 | 0.90    |

**Table S5:** Parameters from cRDA runs: number of axes retained by the parallel analysis criterion, and component axes significantly correlated with constrained ordination axes. Data are shown for all selection strengths (full simulation data set) and simulation data with weak selection only.

| Demo-<br>graphy | De-<br>sign | Env | Retained axes |         | All selection strengths              |                                       | Weak selection only                  |                                       |
|-----------------|-------------|-----|---------------|---------|--------------------------------------|---------------------------------------|--------------------------------------|---------------------------------------|
|                 |             |     | 6 ind.        | 20 ind. | Significant<br>components:<br>6 ind. | Significant<br>components:<br>20 ind. | Significant<br>components:<br>6 ind. | Significant<br>components:<br>20 ind. |
| 1R              | P           | 453 | 540           | 1800    | 2,1                                  | 2                                     | 1,2                                  | NA                                    |
| 1R              | P           | 950 | 540           | 1800    | 2,1                                  | 2                                     | 2,1                                  | 2                                     |
| 1R              | P           | 988 | 540           | 1800    | 1,2                                  | 2                                     | 1,2                                  | 8,11,1300                             |
| 1R              | R           | 453 | 540           | 1800    | 2,1                                  | 2                                     | 1,3                                  | NA                                    |
| 1R              | R           | 950 | 540           | 1800    | 1,2                                  | 2                                     | 2,1                                  | NA                                    |
| 1R              | R           | 988 | 540           | 1800    | 2,1                                  | 2                                     | 1,2                                  | 9                                     |
| 1R              | T           | 453 | 540           | 1800    | 2,1                                  | 2,1                                   | 1,3                                  | 1,7,995,1421                          |
| 1R              | T           | 950 | 540           | 1800    | 1,2                                  | 2                                     | 1,3                                  | 8                                     |
| 1R              | T           | 988 | 540           | 1800    | 2,1                                  | 2                                     | 2,1                                  | 7,9                                   |
| 2R              | P           | 453 | 540           | 1800    | 1,2                                  | 2,1                                   | 2,1                                  | 1,2                                   |
| 2R              | P           | 950 | 540           | 1800    | 1,2                                  | 1,2                                   | 1,2                                  | 1,2                                   |
| 2R              | P           | 988 | 540           | 1800    | 1,2                                  | 2,1                                   | 1,2                                  | 2,1                                   |
| 2R              | R           | 453 | 540           | 1800    | 1,2                                  | 2,1                                   | 1,2                                  | 2,1                                   |
| 2R              | R           | 950 | 540           | 1800    | 1,2                                  | 1,2                                   | 1,2                                  | 1,2                                   |
| 2R              | R           | 988 | 540           | 1800    | 2,1                                  | 2,1                                   | 1,2                                  | 11,348                                |
| 2R              | T           | 453 | 540           | 1800    | 1,2                                  | 1,2                                   | 1,2                                  | 2,1                                   |
| 2R              | T           | 950 | 540           | 1800    | 2,1                                  | 1,2                                   | 1,2                                  | 1,2                                   |
| 2R              | T           | 988 | 540           | 1800    | 2,1                                  | 2,1                                   | 1,2                                  | 1,2                                   |
| IBD             | P           | 453 | 540           | 1800    | 1                                    | 1                                     | 1                                    | 1                                     |
| IBD             | P           | 950 | 540           | 1800    | 1,2                                  | 1                                     | 1                                    | 1                                     |
| IBD             | P           | 988 | 540           | 1800    | 1                                    | 1                                     | 2,1                                  | 1                                     |
| IBD             | R           | 453 | 540           | 1800    | 1                                    | 1                                     | 2,1                                  | 1                                     |
| IBD             | R           | 950 | 540           | 1800    | 1                                    | 1                                     | 1                                    | 1                                     |
| IBD             | R           | 988 | 540           | 1800    | 1                                    | 1                                     | 1                                    | 1                                     |
| IBD             | T           | 453 | 540           | 1800    | 1                                    | 1                                     | 1                                    | 1                                     |
| IBD             | T           | 950 | 540           | 1800    | 183,1                                | 1                                     | 1                                    | 1                                     |
| IBD             | T           | 988 | 540           | 1800    | 263,1                                | 1                                     | 1                                    | 1                                     |
| IM              | P           | 453 | 540           | 1800    | 1                                    | 1                                     | NA                                   | 31,726                                |
| IM              | P           | 950 | 540           | 1800    | 1                                    | 1                                     | NA                                   | 13,704,024,<br>624,941,500            |
| IM              | P           | 988 | 540           | 1800    | 235,1                                | 1                                     | NA                                   | 2,66,207,1295,270                     |
| IM              | R           | 453 | 540           | 1800    | 1                                    | 1                                     | NA                                   | NA                                    |
| IM              | R           | 950 | 540           | 1800    | 1                                    | 1                                     | NA                                   | 1,371,254                             |
| IM              | R           | 988 | 540           | 1800    | 1                                    | 1                                     | NA                                   | 47                                    |
| IM              | T           | 453 | 540           | 1800    | 1                                    | 1                                     | NA                                   | 3,891,131,<br>115,591,780             |
| IM              | T           | 950 | 540           | 1800    | 1                                    | 1                                     | NA                                   | NA                                    |
| IM              | T           | 988 | 540           | 1800    | 1                                    | 935,1                                 | NA                                   | 184,512,191,681                       |

**Table S6:** Percent variance explained for uncorrected and corrected Random Forest models.

|            |        |     | 6 individuals sampled per deme |                |                 |                |
|------------|--------|-----|--------------------------------|----------------|-----------------|----------------|
|            |        |     | Uncorrected                    |                | Corrected       |                |
| Demography | Design | Env | PVE:<br>Habitat                | PVE:<br>Xcoord | PVE:<br>Habitat | PVE:<br>Xcoord |
| 1R         | R      | 453 | 0.86                           | 0.85           | 0.87            | 0.98           |
| 1R         | R      | 950 | 0.81                           | 0.84           | 0.85            | 0.98           |
| 1R         | R      | 988 | 0.81                           | 0.86           | 0.85            | 0.98           |
| 1R         | P      | 453 | 0.88                           | 0.87           | 0.88            | 0.97           |
| 1R         | P      | 950 | 0.90                           | 0.88           | 0.88            | 0.98           |
| 1R         | P      | 988 | 0.88                           | 0.87           | 0.89            | 0.98           |
| 1R         | T      | 453 | 0.83                           | 0.91           | 0.86            | 0.99           |
| 1R         | T      | 950 | 0.87                           | 0.89           | 0.89            | 0.99           |
| 1R         | T      | 988 | 0.82                           | 0.88           | 0.86            | 0.99           |
| 2R         | R      | 453 | 0.85                           | 0.87           | 0.88            | 0.97           |
| 2R         | R      | 950 | 0.80                           | 0.86           | 0.82            | 0.98           |
| 2R         | R      | 988 | 0.81                           | 0.86           | 0.85            | 0.98           |
| 2R         | P      | 453 | 0.87                           | 0.88           | 0.87            | 0.96           |
| 2R         | P      | 950 | 0.90                           | 0.89           | 0.87            | 0.97           |
| 2R         | P      | 988 | 0.89                           | 0.88           | 0.88            | 0.96           |
| 2R         | T      | 453 | 0.83                           | 0.91           | 0.87            | 0.98           |
| 2R         | T      | 950 | 0.86                           | 0.90           | 0.91            | 0.98           |
| 2R         | T      | 988 | 0.82                           | 0.88           | 0.89            | 0.97           |
| IBD        | R      | 453 | 0.86                           | 0.67           | 0.86            | 0.96           |
| IBD        | R      | 950 | 0.81                           | 0.65           | 0.81            | 0.96           |
| IBD        | R      | 988 | 0.80                           | 0.64           | 0.82            | 0.96           |
| IBD        | P      | 453 | 0.88                           | 0.66           | 0.86            | 0.97           |
| IBD        | P      | 950 | 0.89                           | 0.71           | 0.86            | 0.96           |
| IBD        | P      | 988 | 0.89                           | 0.66           | 0.88            | 0.97           |
| IBD        | T      | 453 | 0.84                           | 0.73           | 0.85            | 0.99           |
| IBD        | T      | 950 | 0.84                           | 0.66           | 0.87            | 0.97           |
| IBD        | T      | 988 | 0.82                           | 0.66           | 0.85            | 0.98           |
| IM         | R      | 453 | 0.83                           | 0.41           | 0.83            | 0.39           |
| IM         | R      | 950 | 0.85                           | 0.39           | 0.83            | 0.39           |
| IM         | R      | 988 | 0.81                           | 0.40           | 0.81            | 0.36           |
| IM         | P      | 453 | 0.88                           | 0.42           | 0.88            | 0.38           |
| IM         | P      | 950 | 0.91                           | 0.38           | 0.90            | 0.36           |
| IM         | P      | 988 | 0.88                           | 0.39           | 0.88            | 0.37           |
| IM         | T      | 453 | 0.86                           | 0.36           | 0.85            | 0.35           |
| IM         | T      | 950 | 0.88                           | 0.40           | 0.87            | 0.36           |
| IM         | T      | 988 | 0.85                           | 0.38           | 0.85            | 0.36           |
